# Supplementary material
Source: PubMed Central journal article supplement (PMC3387126)
Supplement: 1204157109_pnas.201204157SI.pdf [file 1204157109_pnas.201204157SI.pdf]

# Supporting Information

Russell and Raich 10.1073/pnas.1204157109

**Table S1. Nitrogen stocks in biomass and detritus ( $\text{kg}\cdot\text{ha}^{-1}$ ) in plantations of four experimental tree species in lowland Costa Rica**

| Component                            | Species                |                       |                      |                        | Mean        |
|--------------------------------------|------------------------|-----------------------|----------------------|------------------------|-------------|
|                                      | <i>Hieronyma</i>       | <i>Pentaclethra</i>   | <i>Virola</i>        | <i>Vochysia</i>        |             |
| Aboveground, nonwoody*               |                        |                       |                      |                        |             |
| Overstory                            | 69 ± 6                 | 123 ± 29              | 72 ± 14              | 64 ± 6                 | 82 ± 27     |
| Understory                           | 31 ± 2                 | 34 ± 11               | 50 ± 5               | 62 ± 16                | 44 ± 14     |
| Branches <sup>†</sup>                |                        |                       |                      |                        |             |
| Overstory                            | 121 ± 10 <sup>AB</sup> | 207 ± 44 <sup>A</sup> | 87 ± 19 <sup>B</sup> | 148 ± 15 <sup>AB</sup> | 141 ± 51    |
| Understory                           | 42 ± 9                 | 42 ± 26               | 79 ± 17              | 99 ± 19                | 66 ± 28     |
| Boles                                |                        |                       |                      |                        |             |
| Overstory                            | 206 ± 22               | 283 ± 93              | 290 ± 63             | 450 ± 43               | 307 ± 102   |
| Understory                           | 12 ± 1                 | 16 ± 12               | 17 ± 4               | 19 ± 7                 | 16 ± 3      |
| Aboveground biomass                  |                        |                       |                      |                        |             |
| Overstory                            | 397 ± 38               | 613 ± 165             | 449 ± 95             | 661 ± 64               | 530 ± 127   |
| Understory                           | 86 ± 11                | 93 ± 48               | 145 ± 24             | 179 ± 38               | 126 ± 45    |
| Total aboveground                    | 482 ± 45               | 706 ± 138             | 594 ± 109            | 841 ± 64               | 656 ± 154   |
| Belowground biomass N                |                        |                       |                      |                        |             |
| Fine roots, aboveground <sup>‡</sup> | 12 ± 5                 | 1 ± 0                 | 1 ± 1                | 1 ± 1                  | 4 ± 3       |
| Fine roots, 0–15 cm                  | 59 ± 1                 | 64 ± 7                | 61 ± 6               | 64 ± 9                 | 62 ± 1      |
| Fine roots, 15–100 cm                | 36 ± 6                 | 41 ± 9                | 35 ± 9               | 29 ± 3                 | 35 ± 3      |
| Medium roots                         | 24 ± 1                 | 37 ± 6                | 40 ± 11              | 33 ± 11                | 33 ± 7      |
| Large roots, stumps                  | 73 ± 12                | 121 ± 26              | 61 ± 13              | 99 ± 17                | 88 ± 27     |
| Total belowground                    | 192 ± 9                | 261 ± 29              | 196 ± 29             | 224 ± 34               | 218 ± 32    |
| Total biomass N                      | 674 ± 53               | 967 ± 152             | 790 ± 127            | 1,065 ± 81             | 874 ± 176   |
| Detritus                             |                        |                       |                      |                        |             |
| Surface litter <sup>§</sup>          | 101 ± 8 <sup>AB</sup>  | 79 ± 7 <sup>AB</sup>  | 59 ± 5 <sup>B</sup>  | 109 ± 15 <sup>A</sup>  | 87 ± 23     |
| Coarse woody debris                  | 16 ± 4                 | 21 ± 5                | 9 ± 2                | 20 ± 2                 | 16 ± 5      |
| Dead roots, all sizes                | 25 ± 2 <sup>BC</sup>   | 47 ± 8 <sup>A</sup>   | 45 ± 2 <sup>AB</sup> | 15 ± 2 <sup>C</sup>    | 33 ± 16     |
| Total detritus                       | 142 ± 4                | 147 ± 15              | 114 ± 8              | 144 ± 14               | 137 ± 15    |
| Total biomass and detritus           | 816 ± 54               | 1,114 ± 158           | 903 ± 120            | 1,209 ± 94             | 1,011 ± 182 |

Means ( $\pm$ SEM) are based on  $n = 4$ . Tree species are *Hieronyma alchorneoides*, *Pentaclethra macroloba*, *Virola koschnyi*, and *Vochysia guatemalensis*. Means within a row followed by the same superscript letter do not differ significantly among species [Tukey's honestly significant difference (HSD),  $P = 0.05$ ].

\*Nonwoody includes leaves, flowers, and fruits, and is equivalent to canopy. Overstory (planted) trees are  $\geq 10$  cm in diameter at breast height; understory includes trees and saplings  $\geq 2.5$  cm in diameter and understory herbs and shrubs.

<sup>†</sup>Branches are  $\leq 10$  cm in diameter; boles are  $> 10$  cm in diameter.

<sup>‡</sup>Fine roots are unsubsized and generally  $\leq 2$  mm, medium roots are  $> 0.2$ – $1$  cm, and large roots are  $> 1$  cm in diameter and include stumps and stump roots, with all root categories measured to 1-m depth.

<sup>§</sup>"Surface litter" includes the O horizon of the soil; coarse woody debris does not include standing dead, which was negligible in these aggrading systems.

**Table S2. Soil N stocks (kg·ha<sup>-1</sup>) and C:N in plantations and reference sites in lowland Costa Rica**

| Soil property | Depth (cm) | Vegetation                 |                            |                            |                            |                           | Forest*                   |
|---------------|------------|----------------------------|----------------------------|----------------------------|----------------------------|---------------------------|---------------------------|
|               |            | <i>Hieronyma</i>           | <i>Pentaclethra</i>        | <i>Virola</i>              | <i>Vochysia</i>            | Pasture*                  |                           |
| Total N       | 0–15       | 3,564 ± 208 <sup>BC</sup>  | 3,424 ± 134 <sup>C</sup>   | 3,460 ± 23 <sup>C</sup>    | 3,909 ± 149 <sup>AB</sup>  | 3,645 ± 89 <sup>BC</sup>  | 4,200 ± 217 <sup>A</sup>  |
|               | 15–30      | 3,264 ± 86 <sup>B</sup>    | 3,227 ± 195 <sup>B</sup>   | 2,974 ± 90 <sup>B</sup>    | 3,474 ± 113 <sup>AB</sup>  | 3,736 ± 85 <sup>A</sup>   | 3,826 ± 212 <sup>A</sup>  |
|               | 30–50      | 2,685 ± 72 <sup>BC</sup>   | 2,152 ± 176 <sup>C</sup>   | 2,528 ± 172 <sup>BC</sup>  | 2,961 ± 111 <sup>AB</sup>  | 3,432 ± 426 <sup>A</sup>  | 2,942 ± 266 <sup>AB</sup> |
|               | 50–75      | 2,575 ± 136 <sup>AB</sup>  | 2,162 ± 279 <sup>B</sup>   | 2,697 ± 159 <sup>AB</sup>  | 2,981 ± 42 <sup>A</sup>    | 3,081 ± 349 <sup>A</sup>  | 2,750 ± 84 <sup>A</sup>   |
|               | 75–100     | 2,410 ± 43 <sup>A</sup>    | 1,812 ± 262 <sup>B</sup>   | 2,516 ± 111 <sup>A</sup>   | 2,589 ± 40 <sup>A</sup>    | 2,504 ± 243 <sup>A</sup>  | 2,552 ± 54 <sup>A</sup>   |
|               | 0–100      | 14,498 ± 481 <sup>AB</sup> | 12,777 ± 915 <sup>B</sup>  | 14,175 ± 498 <sup>B</sup>  | 15,914 ± 146 <sup>A</sup>  | 16,365 ± 767 <sup>A</sup> | 16,131 ± 669 <sup>A</sup> |
| C:N           | 0–100      | 12.37 ± 0.28 <sup>A</sup>  | 11.76 ± 0.44 <sup>AB</sup> | 11.64 ± 0.24 <sup>AB</sup> | 11.70 ± 0.14 <sup>AB</sup> | 11.25 ± 0.05 <sup>B</sup> | 11.01 ± 0.42 <sup>B</sup> |

Means (±SEM) are based on  $n = 4$  blocks in plantations, three or four replicates in other vegetation. Tree species are as in Table S1. Means within a row followed by the same superscript letter do not differ significantly among species (Tukey's HSD,  $P = 0.05$ ).

\*Pasture refers to abandoned pasture, and forest refers to mature forest; both sets of reference sites are situated within 500 m of experimental plots, on the same soil type.

**Table S3. Nitrogen uptake (kg·ha<sup>-1</sup>·y<sup>-1</sup>) in plantations of four experimental tree species in lowland Costa Rica**

| Component                       | Species                |                       |                       |                        | Mean     |
|---------------------------------|------------------------|-----------------------|-----------------------|------------------------|----------|
|                                 | <i>Hieronyma</i>       | <i>Pentaclethra</i>   | <i>Virola</i>         | <i>Vochysia</i>        |          |
| Fine litterfall                 | 157 ± 11 <sup>B</sup>  | 199 ± 15 <sup>A</sup> | 115 ± 8 <sup>C</sup>  | 155 ± 5 <sup>BC</sup>  | 157 ± 34 |
| Branchfall                      | 9 ± 2                  | 22 ± 9                | 4 ± 1                 | 12 ± 3                 | 12 ± 4   |
| Overstory N uptake*             |                        |                       |                       |                        |          |
| Nonwoody <sup>†</sup>           | 106 ± 9                | 147 ± 31              | 75 ± 8                | 108 ± 3                | 109 ± 30 |
| Branches                        | 15 ± 3                 | 34 ± 11               | 9 ± 2                 | 20 ± 3                 | 20 ± 11  |
| Bolewood                        | 12 ± 2                 | 27 ± 8                | 17 ± 4                | 24 ± 1                 | 20 ± 7   |
| Total overstory                 | 133 ± 12               | 209 ± 48              | 101 ± 14              | 152 ± 3                | 149 ± 45 |
| Understory N uptake             |                        |                       |                       |                        |          |
| Nonwoody                        | 54 ± 7                 | 59 ± 21               | 60 ± 4                | 57 ± 12                | 57 ± 3   |
| Branches                        | 19 ± 4                 | 21 ± 4                | 21 ± 1                | 32 ± 2                 | 23 ± 6   |
| Bolewood                        | 2 ± 1                  | 3 ± 2                 | 4 ± 1                 | 3 ± 1                  | 3 ± 1    |
| Total understory                | 75 ± 10                | 83 ± 27               | 85 ± 4                | 92 ± 11                | 84 ± 7   |
| ΔBiomass <sup>‡</sup>           |                        |                       |                       |                        |          |
| Canopy                          | 5 ± 1                  | 9 ± 1                 | 8 ± 1                 | 8 ± 1                  | 8 ± 2    |
| Woody tissues                   | 30 ± 3                 | 66 ± 10               | 42 ± 8                | 49 ± 2                 | 47 ± 15  |
| Total                           | 35 ± 4 <sup>B</sup>    | 75 ± 11 <sup>A</sup>  | 51 ± 9 <sup>AB</sup>  | 57 ± 1 <sup>AB</sup>   | 54 ± 17  |
| ΔBiomass, years 0–17            | 41 ± 4                 | 60 ± 10               | 49 ± 8                | 67 ± 5                 | 55 ± 11  |
| Total aboveground               | 209 ± 14 <sup>AB</sup> | 292 ± 33 <sup>A</sup> | 186 ± 11 <sup>B</sup> | 244 ± 8 <sup>AB</sup>  | 233 ± 46 |
| Fine root ingrowth <sup>§</sup> | 127 ± 9 <sup>A</sup>   | 94 ± 10 <sup>AB</sup> | 75 ± 9 <sup>B</sup>   | 122 ± 22 <sup>AB</sup> | 105 ± 24 |
| Medium root growth              | 2 ± 0                  | 3 ± 1                 | 3 ± 1                 | 2 ± 1                  | 2 ± 1    |
| Large root growth               | 4 ± 1 <sup>B</sup>     | 20 ± 8 <sup>A</sup>   | 1 ± 0 <sup>B</sup>    | 3 ± 1 <sup>B</sup>     | 7 ± 9    |
| Total belowground               | 133 ± 9                | 117 ± 14              | 79 ± 9                | 127 ± 23               | 114 ± 24 |
| Total N uptake                  | 341 ± 11 <sup>AB</sup> | 409 ± 35 <sup>A</sup> | 265 ± 18 <sup>B</sup> | 371 ± 21 <sup>A</sup>  | 347 ± 61 |

Means (±SEM) are based on  $n = 4$ . Tree species are as in Table S1. Means within a row followed by the same superscript letter do not differ significantly among species (Tukey's HSD,  $P = 0.05$ ). Due to rounding, not all totals are consistent.

\*N uptake values include ΔBiomass.

<sup>†</sup>Nonwoody (=canopy) includes leaves, flowers, and fruits. Branches are ≤10 cm in diameter; boles are >10 cm in diameter.

<sup>‡</sup>ΔBiomass was determined as the sum of growth increments of each tree within each plot; values reported are the means of years 15–17 and include nonwoody and woody tissues (branches, bolewood, and roots >2 mm). Long-term rates were determined by dividing total biomass N by age (16 y).

<sup>§</sup>Fine roots are unsubsized roots, generally ≤2 mm; medium roots are >0.2–1 cm; large roots are >1 cm in diameter and include stumps and stump roots. Fine-root ingrowth is for the 0–15 cm depth only; larger root growth extends to 1.0-m depth. Fine-root ΔBiomass was zero.
